# Supplementary material for: Hungarian Linguistic, Cross-Cultural and Age Adaptation of Transition Specific Questionnaires in Patients with Inflammatory Bowel Disease
Source: MDPI journal article supplement (doi:10.3390/children10040711), 2023-04-12
Supplement: s1 [file s1]

**Supplementary Table S5    The mean and the Cronbach's  $\alpha$  values of the domains in TRAQ**

| <i>Domains</i>                   | <i>mean values of patients' transition readiness (SD)</i> | <i>Cronbach's <math>\alpha</math></i> |
|----------------------------------|-----------------------------------------------------------|---------------------------------------|
| <i>managing medication</i>       | 3.820 ( $\pm$ 0.862)                                      | 0.724                                 |
| <i>appointment keeping</i>       | 3.448 ( $\pm$ 0.886)                                      | 0.827                                 |
| <i>tracking health issues</i>    | 2.777 ( $\pm$ 0.988)                                      | 0.546                                 |
| <i>talking with providers</i>    | 3.005 ( $\pm$ 1.105)                                      | 0.577                                 |
| <i>managing daily activities</i> | 3.751 ( $\pm$ 0.930)                                      | 0.622                                 |
