# Supplementary material for: Hungarian Linguistic, Cross-Cultural and Age Adaptation of Transition Specific Questionnaires in Patients with Inflammatory Bowel Disease
Source: MDPI journal article supplement (doi:10.3390/children10040711), 2023-04-12
Supplement: s1 [file s1]

**Supplementary Table S7    The mean and the Cronbach's  $\alpha$  values of the domains in STARx**

| <i>Domains</i>                        | <i>mean values of patients' and parents transition readiness (SD)</i> |                      | <i>Cronbach's <math>\alpha</math></i> |         |
|---------------------------------------|-----------------------------------------------------------------------|----------------------|---------------------------------------|---------|
|                                       | STARx-A                                                               | STARx-P              | STARx-A                               | STARx-P |
| <i>medication management</i>          | 3.475 ( $\pm$ 1.479)                                                  | 3.391 ( $\pm$ 1.461) | 0.457                                 | 0.449   |
| <i>provider communication</i>         | 4.335 ( $\pm$ 0.775)                                                  | 4.208 ( $\pm$ 0.809) | 0.779                                 | 0.828   |
| <i>engagement during appointments</i> | 3.747 ( $\pm$ 1.202)                                                  | 3.823 ( $\pm$ 1.095) | 0.636                                 | 0.474   |
| <i>disease knowledge</i>              | 4.393 ( $\pm$ 0.908)                                                  | 4.660 ( $\pm$ 0.658) | 0.575                                 | 0.720   |
| <i>adult health responsibilities</i>  | 3.469 ( $\pm$ 1.136)                                                  | 3.535 ( $\pm$ 1.169) | 0.633                                 | 0.543   |
| <i>resource utilization</i>           | 2.943 ( $\pm$ 1.412)                                                  | 3.095 ( $\pm$ 1.442) | 0.014                                 | 0.297   |
