# Supplementary material for: Hungarian Linguistic, Cross-Cultural and Age Adaptation of Transition Specific Questionnaires in Patients with Inflammatory Bowel Disease
Source: MDPI journal article supplement (doi:10.3390/children10040711), 2023-04-12
Supplement: s1 [file s1]

Supplementary Table S3 Correlation between total and domain subscores of the questionnaires and demographic data

| <i>p values of the questionnaires total score and domains</i> |                                         | <i>gender</i> | <i>ethnicity</i> | <i>age at adaptation<sup>1</sup></i> | <i>disease duration time<sup>1</sup></i> | <i>disease type</i> | <i>previous intestinal surgery</i> | <i>number of medications</i> | <i>biological treatment</i> | <i>steroid treatment</i> | <i>AZA treatment</i> | <i>5-ASA treatment</i> | <i>comorbidities</i> |
|---------------------------------------------------------------|-----------------------------------------|---------------|------------------|--------------------------------------|------------------------------------------|---------------------|------------------------------------|------------------------------|-----------------------------|--------------------------|----------------------|------------------------|----------------------|
| IBD-SES                                                       | <i>total score</i>                      | 0.549         | 0.745            | 0.091                                | 0.194                                    | <b>0.016</b>        | 0.375                              | 0.246                        | 0.217                       | 0.755                    | <b>0.008</b>         | 0.515                  | 0.596                |
|                                                               | <i>‘managing medical care’</i>          | 0.364         | 0.869            | 0.075                                | 0.412                                    | <b>0.008</b>        | 0.082                              | 0.955                        | 0.372                       | 0.617                    | 0.069                | 0.925                  | 0.451                |
|                                                               | <i>managing everyday life with IBD’</i> | 0.625         | 0.609            | 0.197                                | 0.273                                    | 0.065               | 0.452                              | <b>0.034</b>                 | 0.248                       | 0.708                    | <b>0.003</b>         | 0.412                  | 0.442                |
|                                                               | <i>managing feelings’</i>               | 0.372         | 0.648            | 0.130                                | 0.137                                    | 0.243               | 0.846                              | 0.093                        | 0.115                       | 0.535                    | 0.113                | 0.992                  | 0.985                |
| TRAQ                                                          | <i>total score</i>                      | 0.401         | 0.536            | <b>0.000</b>                         | 0.994                                    | 0.871               | 0.754                              | 0.672                        | 0.413                       | 0.352                    | 0.882                | 0.302                  | 0.832                |
|                                                               | <i>‘managing medications’</i>           | 0.830         | 0.367            | <b>0.000</b>                         | 0.227                                    | 0.927               | 0.705                              | 0.140                        | 0.630                       | 0.545                    | 0.704                | 0.055                  | 0.710                |
|                                                               | <i>‘appointment keeping’</i>            | 0.576         | 0.148            | <b>0.001</b>                         | 0.933                                    | 0.515               | 0.635                              | 0.905                        | 0.772                       | 0.313                    | 0.797                | 0.488                  | 0.899                |
|                                                               | <i>‘tracking health issues’</i>         | <b>0.044</b>  | 0.731            | <b>0.000</b>                         | 0.627                                    | 0.664               | 0.643                              | 0.260                        | <b>0.040</b>                | 0.221                    | 0.100                | 0.913                  | 0.836                |
|                                                               | <i>‘talking with providers’</i>         | 0.948         | 0.299            | 0.105                                | 0.864                                    | 0.328               | 0.731                              | 0.809                        | 0.581                       | 0.919                    | 0.328                | 0.573                  | 0.753                |
|                                                               | <i>‘managing daily activities’</i>      | <b>0.004</b>  | 0.694            | 0.068                                | 0.510                                    | 0.688               | 0.661                              | 0.587                        | 0.198                       | 0.662                    | 0.362                | 0.465                  | 0.381                |
| STARx-A                                                       | <i>total score</i>                      | 0.506         | 0.763            | 0.194                                | 0.445                                    | 0.387               | 0.586                              | 0.600                        | 0.971                       | 0.559                    | 0.122                | 0.504                  | 0.526                |
|                                                               | <i>‘medication management’</i>          | 0.831         | <b>0.034</b>     | 0.551                                | 0.052                                    | 0.200               | 0.155                              | 0.067                        | 0.168                       | 0.617                    | 0.732                | 0.378                  | 0.473                |
|                                                               | <i>‘provider communication’</i>         | 0.792         | 0.990            | 0.580                                | 0.583                                    | 0.119               | 0.814                              | 0.252                        | 0.876                       | 0.372                    | 0.304                | 0.204                  | 0.253                |
|                                                               | <i>‘engagement during appointments’</i> | 0.780         | 0.935            | 0.350                                | <b>0.032</b>                             | 0.050               | 0.801                              | 0.380                        | 0.995                       | 0.185                    | 0.221                | 0.346                  | 0.726                |
|                                                               | <i>disease knowledge</i>                | 0.119         | 0.213            | 0.988                                | 0.246                                    | 0.333               | 0.319                              | 0.795                        | 0.759                       | 0.578                    | 0.630                | 0.679                  | 0.685                |
|                                                               | <i>‘adult health responsibilities’</i>  | 0.758         | 0.942            | 0.201                                | 0.661                                    | 0.175               | 0.196                              | 0.923                        | 0.218                       | 0.276                    | 0.982                | 0.592                  | 0.556                |
|                                                               | <i>‘resource utilization’</i>           | 0.408         | 0.773            | 0.407                                | 0.708                                    | 0.169               | 0.625                              | 0.569                        | 0.142                       | 0.430                    | 0.343                | 0.317                  | 0.982                |

<sup>1</sup>: results are given in correlation coefficients ( $\rho$ )

Significant results are shown in bold

AZA: azathioprine; 5-ASA: 5-aminosalicylic acid
