# Supplementary material for: Hungarian Linguistic, Cross-Cultural and Age Adaptation of Transition Specific Questionnaires in Patients with Inflammatory Bowel Disease
Source: MDPI journal article supplement (doi:10.3390/children10040711), 2023-04-12
Supplement: s1 [file s1]

**STARx Transition Readiness Questionnaire (Adolescent Version)**  
**STARx tranzíciós felkészültség kérdőív (serdülő példánya)**

| Original version                                                                                                                                      | Hungarian version                                                                                                                                                                                                                                                           |
|-------------------------------------------------------------------------------------------------------------------------------------------------------|-----------------------------------------------------------------------------------------------------------------------------------------------------------------------------------------------------------------------------------------------------------------------------|
| <b>Section 1. Please check the one that shows how often you have done each thing in the past 3 months.</b>                                            | <b>1. rész</b> Milyen gyakran végezted a következő dolgokat az elmúlt <b>3 hónapban</b> ? Kérjük, jelöld be mindegyik sorban azt az <u>egy</u> négyzetet, amelyik a legjellemzőbb!                                                                                          |
| 1. How often did you make an effort to understand what your doctor told you?                                                                          | 1. Milyen gyakran törekedtél arra, hogy megértsd a kezelőorvos által mondottakat?                                                                                                                                                                                           |
| 2. How often did you take your medicines on your own?                                                                                                 | 2. Milyen gyakran vettél be önállóan a gyógyszereid?                                                                                                                                                                                                                        |
| 3. How often did you ask doctors or nurses questions about your illness, medicines or medical care?                                                   | 3. Milyen gyakran tettél fel kérdéseket az kezelőorvosodnak vagy a nővéreknek a betegséggeddel, gyógyszereiddel vagy az ellátással kapcsolatban?                                                                                                                            |
| 4. How often did you make your own appointments?                                                                                                      |                                                                                                                                                                                                                                                                             |
| 5. How often did you need someone to remind you to take your medicines?                                                                               | 5. Milyen gyakran kellett emlékeztetni a gyógyszereid beszedésére?                                                                                                                                                                                                          |
| 6. How often did you use things like pillboxes, schedules, or alarm to help you take their medicines when they were supposed to?                      | 6. Milyen gyakran használtál emlékeztetőt vagy ébresztőórát, hogy időben vedd be a gyógyszereidet?                                                                                                                                                                          |
| 7. How often did you use the internet, books or other guides to find out more about his/her illness?                                                  | 7. Milyen gyakran használtál internetet, könyveket vagy egyéb útmutatókat, hogy tájékozódj a betegséggeddel kapcsolatban?                                                                                                                                                   |
| 8. How often did you forget to take your medicines?                                                                                                   | 8. Milyen gyakran felejtetted el bevenni a gyógyszereid?                                                                                                                                                                                                                    |
| 9. How often did you work with your doctor to take care of new health problems that came up?                                                          | 9. Milyen gyakran beszéltél az orvosoddal az újonnan fellépő egészségi problémák megoldásáról?                                                                                                                                                                              |
| <b>Section 2. Some patients know a lot about their health and some patients do not. How much does you know? Please check the best answer.</b>         | <b>2. rész</b> Egyes betegek sokat tudnak az egészségükről, egyesek viszont keveset. Te mennyit tudsz? Jelöld meg azt a válaszlehetőséget, amelyik a <b>mai napon</b> legjobban tükrözi a betegséggeddel kapcsolatos tudásod!                                               |
| 10. How much do you know about your illness?                                                                                                          | 10. Mennyi mindent tudsz a betegséggedről?                                                                                                                                                                                                                                  |
| 11. How much do you know about taking care of your illness?                                                                                           | 11. Mit tudsz elmondani a betegségged kezeléséről?                                                                                                                                                                                                                          |
| 12. How much do you know about what will happen if you do not take your medicines?                                                                    | 12. Mit tudsz arról, hogy mi fog történni, ha nem szeded rendszeren a gyógyszereid?                                                                                                                                                                                         |
| <b>Section 3. Some patients may find it hard to do certain things. Please check what best describes how easy or hard you feel it will be for you.</b> | <b>3. rész</b> Néhány beteg nehezen tud bizonyos dolgokat végrehajtani. Neked mennyire könnyű vagy nehéz a következő dolgokat megcsinálnod? Jelöld meg azt a válaszlehetőséget, amelyik a <b>mai napon</b> legjobban tükrözi, hogy mennyire találod nehéznek az alábbiakat! |
| 13. How easy or hard is it for you to talk to your doctor?                                                                                            | 13. Mennyire könnyű vagy nehéz az orvosoddal beszélgetni?                                                                                                                                                                                                                   |
| 14. How easy or hard is it for you to make a plan with your doctor to care for your health?                                                           | 14. Mennyire könnyű vagy nehéz az orvosoddal terveket készíteni az egészségged gondozásával kapcsolatban?                                                                                                                                                                   |
| 15. How easy or hard is it for you to see your doctor by yourself?                                                                                    |                                                                                                                                                                                                                                                                             |

|                                                                                                     |                                                                                                  |
|-----------------------------------------------------------------------------------------------------|--------------------------------------------------------------------------------------------------|
| 16. How easy or hard is it for you to take your medicines the way they are supposed to?             | 16. Mennyire könnyű vagy nehéz úgy szedni a gyógyszereidet, ahogy azokat az orvos előírja?       |
| 17. How easy or hard is it for you to take care of yourself?                                        | 17. Mennyire könnyű vagy nehéz magadról gondoskodnod?                                            |
| 18. How easy or hard do you think it will be for you to move from pediatrics to adult-focused care? | 18. Mennyire lesz könnyű vagy nehéz a gyermekorvostól a felnőtt gasztroenterológushoz átkerülni? |

**STARx Transition Readiness Questionnaire (ParentVersion)**  
**STARx tranzíciós felkészültség kérdőív (szülő példánya)**

| Original version                                                                                                                                                               | Hungarian version                                                                                                                                                                                                                                                           |
|--------------------------------------------------------------------------------------------------------------------------------------------------------------------------------|-----------------------------------------------------------------------------------------------------------------------------------------------------------------------------------------------------------------------------------------------------------------------------|
| <b>Section 1. Please check the one that shows how often your child has done each thing in the past 3 months.</b>                                                               | <b>1. rész</b> Milyen gyakran végezted a következő dolgokat az elmúlt <b>3 hónapban</b> ? Kérjük, jelöld be mindegyik sorban azt az <b>egy négyzetet</b> , amelyik a legjellemzőbb!                                                                                         |
| 1. How often did your child make an effort to understand what his/her doctor told them?                                                                                        | 1. Milyen gyakran törekedett gyermeke arra, hogy megértse a kezelőorvos által mondottakat?                                                                                                                                                                                  |
| 2. How often did your child take his/her medicines on their own?                                                                                                               | 2. Milyen gyakran vette be gyermeke önállóan a gyógyszereit?                                                                                                                                                                                                                |
| 3. How often did your child ask his/her doctor or nurse questions about their illness, medicines or medical care?                                                              | 3. Milyen gyakran tett fel gyermeke kérdéseket az kezelőorvosnak vagy a nővéreknek a betegségével, gyógyszereivel vagy az ellátással kapcsolatban?                                                                                                                          |
| 4. How often did your child make their own appointments?                                                                                                                       |                                                                                                                                                                                                                                                                             |
| 5. How often did your child need someone to remind him/her to take their medicines?                                                                                            | 5. Milyen gyakran kellett valakinek emlékeztetni gyermekét a gyógyszerei beszedésére?                                                                                                                                                                                       |
| 6. How often did your child use things likes pillboxes, schedules, or alarm clocks to help him/her take their medicines when they were supposed to?                            | 6. Milyen gyakran használ gyermeke gyógyszerdobozt, emlékeztetőt vagy ébresztőórát, hogy időben bevegye a gyógyszereit?                                                                                                                                                     |
| 7. How often did your child use the internet, books or other guides to find out more about his/her illness?                                                                    | 7. Milyen gyakran használ gyermeke internetet, könyveket vagy egyéb útmutatókat, hogy tájékozódjon a betegségével kapcsolatban?                                                                                                                                             |
| 8. How often did your child forget to take his/her medicines?                                                                                                                  | 8. Milyen gyakran felejtette el gyermeke bevenni a gyógyszereit?                                                                                                                                                                                                            |
| 9. How often did your child work with his/her doctor to take care of new health problems that came up?                                                                         | 9. Milyen gyakran beszél át gyermeke az újonnan fellépő egészségügyi problémáit az orvosával?                                                                                                                                                                               |
| <b>Section 2. Some patients know a lot about their health and some patients do not. How much does your child know? Please check the answer that describes your child most.</b> | <b>2. rész</b> Egyes betegek sokat tudnak az egészségükről, egyesek viszont keveset. Te mennyit tudsz? Jelöld meg azt a válaszlehetőséget, amelyik a <b>mai napon</b> legjobban tükrözi a betegséggeddel kapcsolatos tudásod!                                               |
| 10. How much does your child know about his/her illness?                                                                                                                       | 10. Mennyi mindent tud gyermeke a betegségéről?                                                                                                                                                                                                                             |
| 11. How much does your child know about taking care of his/her illness?                                                                                                        | 11. Mit tud elmondani gyermeke a betegség kezeléseéről?                                                                                                                                                                                                                     |
| 12. How much does your child know about what will happen if he/she does not take their medicines?                                                                              | 12. Mit tud gyermeke arról, hogy mi fog történni, ha nem szedi a gyógyszereit?                                                                                                                                                                                              |
| <b>Section 3. Some patients may find it hard to do certain things. Please check what best describes how easy or hard you feel this is/will be for your child.</b>              | <b>3. rész</b> Néhány beteg nehezen tud bizonyos dolgokat végrehajtani. Neked mennyire könnyű vagy nehéz a következő dolgokat megcsinálnod? Jelöld meg azt a válaszlehetőséget, amelyik a <b>mai napon</b> legjobban tükrözi, hogy mennyire találod nehéznek az alábbiakat! |
| 13. How easy or hard is it for your child to talk to his/her doctor?                                                                                                           | 13. Mennyire könnyű vagy nehéz gyermekének az orvosával beszélni?                                                                                                                                                                                                           |

|                                                                                                            |                                                                                                                 |
|------------------------------------------------------------------------------------------------------------|-----------------------------------------------------------------------------------------------------------------|
| 14. How easy or hard is it for your child to make a plan with his/her doctor to care for his/her health?   | 14. Mennyire könnyű vagy nehéz gyermekének az orvosával terveket készíteni az egészséggondozással kapcsolatban? |
| 15. How easy or hard is it for your child to see his/her doctor by himself or herself?                     |                                                                                                                 |
| 16. How easy or hard is it for your child to take his/her medicines like they are supposed to?             | 16. Mennyire könnyű vagy nehéz gyermekének úgy szedni a gyógyszereit, ahogy azok elő vannak írva?               |
| 17. How easy or hard is it for your child to take care of himself/herself?                                 | 17. Mennyire könnyű vagy nehéz gyermekének magáról gondoskodnia?                                                |
| 18. How easy or hard do you think it will be for your child to move from pediatrics to adult-focused care? | 18. Mennyire lesz könnyű vagy nehéz gyermekének a gyermekellátásból a felnőtt ellátásba átkerülnie?             |
