# Supplementary material for: Hungarian Linguistic, Cross-Cultural and Age Adaptation of Transition Specific Questionnaires in Patients with Inflammatory Bowel Disease
Source: MDPI journal article supplement (doi:10.3390/children10040711), 2023-04-12
Supplement: s1 [file s1]

**Supplementary Table S2    The mean and the Cronbach's  $\alpha$  values of the domains in IBD-SES**

| <i>Domains</i>                         | <i>mean values of patients' self-efficacy (SD)</i> | <i>Cronbach's <math>\alpha</math></i> |
|----------------------------------------|----------------------------------------------------|---------------------------------------|
| <i>managing medical care</i>           | 4.002 ( $\pm$ 1.053)                               | 0.585                                 |
| <i>managing everyday life with IBD</i> | 3.892 ( $\pm$ 0.978)                               | 0.472                                 |
| <i>managing feelings</i>               | 4.004 ( $\pm$ 1.039)                               | 0.617                                 |

IBD: inflammatory bowel disease
