# Supplementary material for: Hungarian Linguistic, Cross-Cultural and Age Adaptation of Transition Specific Questionnaires in Patients with Inflammatory Bowel Disease
Source: Children (Basel). 2023 Apr 12;10(4):711. doi: 10.3390/children10040711 (PMC10137128; doi:10.3390/children10040711)
Supplement: Supplementary file 1 [file children-10-00711-s001.zip]

Archive with 8 entries (8 files):
- Supplementary figure_S1.pdf
- Supplementary_table_S1.pdf
- Supplementary_table_S2.pdf
- Supplementary_table_S3.pdf
- Supplementary_table_S4.pdf
- Supplementary_table_S5.pdf
- Supplementary_table_S6.pdf
- Supplementary_table_S7.pdf
